# Supplementary material for: Hydrodeoxygenation of cellulose pyrolysis model compounds using molybdenum oxide and low pressure hydrogen
Source: Royal Society of Chemistry journal article supplement (doi:10.1039/c7gc01477e), 2017-01-01
Supplement: c7gc01477e1.pdf [file c7gc01477e1.pdf]

## ELECTRONIC SUPPLEMENTARY INFORMATION

### Hydrodeoxygenation of Cellulose Pyrolysis Model Compounds using Molybdenum Oxide and Low Pressure Hydrogen

Michael W. Nolte, Alireza Saraeian and Brent H. Shanks

Department of Chemical and Biological Engineering, Iowa State University, Ames, IA, 50011, United States

Center for Biorenewable Chemicals, Iowa State University, Ames, IA, 50011, United States

## S1 Experimental Methods

### S1.1 Tandem Micropyrolyzer

To elaborate on the details provided in the main article, the tandem micropyrolyzer is essentially two reactors in series. Feed is introduced into the top reactor where it is pyrolyzed or volatilized in a H<sub>2</sub> atmosphere. The vapors are swept into the second reactor containing a fixed catalyst bed. The effluent from the catalyst bed is swept in the gas chromatograph (GC) for separation and analysis. For liquid feedstocks, a syringe was filled with 0.2  $\mu$ L of model compound and then directly injected into the top reactor through a septum. Solid feedstock was loaded into stainless steel sample cups, which could then be placed into the reactor. For cellulose, a typical sample mass was around 300  $\mu$ g, while for the model compounds (glycolaldehyde, 5-hydroxymethylfurfural, and levoglucosan) the sample was 150-200  $\mu$ g. The cups were held above the reactor for at least 30 seconds to purge out any air. After purging, the cups were dropped by gravity into the top reactor. The gas flow rate through the reaction system was maintained at 120 mL/min H<sub>2</sub>.

A GC-MS/TCD/FID (Agilent 7890B GC, Agilent 5977A Mass Selective Detector, Thermal Conductivity Detector, Flame Ionization Detector) system was used for product identification and quantification. The GC oven program was as follows: 1) hold for 7.5 min at 30 °C, 2) ramp at 10 °C/min to 300 °C. The MS and FID were used for the identification and quantification of condensable oxygenates and aromatic hydrocarbons and GC separation was achieved using a medium polarity DB-1701 column (Agilent VF-1701ms, 0.25 mm  $\times$  60 m). The light hydrocarbons (alkanes and alkenes) were separated using a GS-Gaspro column (Agilent GS-Gaspro, 0.32 mm  $\times$  60 m) and quantified using the TCD. The light hydrocarbons were identified using pure gas standards.

Fixed catalyst beds were constructed by loading a measured amount of MoO<sub>3</sub> and sand into quartz tubes (3 mm ID). Quartz wool was used to secure the beds in place.

### S1.2 Coke Measurement

Coke yield was measured by quantifying the CO<sub>2</sub> generated during an oxidative treatment of post-reaction catalyst beds. The coke measurement was performed *in situ* using the tandem micropyrolyzer system. After a reaction, the carrier gas was switched from H<sub>2</sub> to 60 mL/min

He. After H<sub>2</sub> had been fully purged from the GC system, 1 mL/min of air was introduced into the reactor through a secondary gas inlet located in between the two reactors. During the oxidative treatment, the catalyst bed temperature was ramped up to 550 °C to ensure all soft and hard coke would be oxidized. The CO<sub>2</sub> yield was quantified by tracking the mass fragment of 44 m/z with the MS.

## S2 Detailed Product Distributions

Table S1: Product distribution from the hydrodeoxygenation of cellulose pyrolysis vapors over MoO<sub>3</sub> at different MoO<sub>3</sub>:cellulose mass loadings. Reaction conditions: 120 mL/min H<sub>2</sub>, 300  $\mu$ g cellulose, 500 °C pyrolysis, 400 °C catalyst bed, catalyst pre-reduced 1 hr. The C<sub>8</sub> aromatic yield includes the summation of ethylbenzene and *p*-, *m*-, and *o*-xylene, and the C<sub>9+</sub> aromatic yield includes the summation of propyl benzene, methyl ethyl benzenes, diethyl benzenes, and naphthalene. The oxygenates yield includes all products which contained at least one oxygen atom (excluding CO and CO<sub>2</sub>). All values are reported in C%.

| Compound                                      | Catalyst:Cellulose Mass Ratio |      |      |       |
|-----------------------------------------------|-------------------------------|------|------|-------|
|                                               | 2:1                           | 10:1 | 20:1 | 200:1 |
| CO                                            | 5.0                           | 4.8  | 4.1  | 4.2   |
| CO <sub>2</sub>                               | 3.2                           | 2.7  | 2.9  | 4.5   |
| Methane                                       | 1.2                           | 1.8  | 3.3  | 0.7   |
| Ethane                                        | 0.5                           | 3.4  | 4.0  | 2.0   |
| Propane                                       | 0.1                           | 0.9  | 3.5  | 15.9  |
| <i>i</i> -Butane                              | 0.0                           | 0.1  | 0.4  | 3.8   |
| <i>n</i> -Butane                              | 0.5                           | 1.4  | 3.7  | 10.0  |
| Pentanes                                      | 0.9                           | 2.3  | 7.6  | 20.5  |
| Hexanes                                       | 0.4                           | 1.8  | 6.7  | 5.0   |
| C <sub>5</sub> -C <sub>6</sub> cyclic alkanes | 0.1                           | 0.5  | 2.4  | 8.9   |
| Ethylene                                      | 0.9                           | 4.5  | 2.9  | 0.0   |
| Propylene                                     | 1.6                           | 5.0  | 5.4  | 0.0   |
| 1-Butene                                      | 0.7                           | 1.2  | 1.2  | 0.0   |
| <i>trans</i> -2-Butene                        | 0.7                           | 2.1  | 3.0  | 0.0   |
| <i>cis</i> -2-Butene                          | 0.3                           | 1.4  | 1.6  | 0.0   |
| Pentenes                                      | 1.0                           | 3.1  | 2.0  | 0.0   |
| Hexenes                                       | 2.6                           | 23.0 | 16.4 | 0.0   |
| C <sub>5</sub> -C <sub>6</sub> cyclic alkenes | 2.2                           | 6.2  | 3.5  | 0.0   |
| Benzene                                       | 0.6                           | 2.0  | 2.7  | 8.2   |
| Toluene                                       | 0.5                           | 1.7  | 2.0  | 4.2   |
| C <sub>8</sub> Aromatics                      | 0.3                           | 1.9  | 2.6  | 1.5   |
| C <sub>9+</sub> Aromatics                     | 0.8                           | 8.3  | 8.1  | 0.0   |
| Oxygenates                                    | 48.4                          | 8.7  | 0.0  | 0.0   |
| Total                                         | 72.5                          | 88.8 | 89.9 | 89.2  |

Table S2: Product distribution of the oxygenated compounds from the hydrodeoxygenation of cellulose pyrolysis vapors over MoO<sub>3</sub> at different MoO<sub>3</sub>:cellulose mass loadings. Reaction conditions: 120 mL/min H<sub>2</sub>, 300  $\mu$ g cellulose, 500 °C pyrolysis, 400 °C catalyst bed, catalyst pre-reduced 1 hr. The oxygenates yield includes all products which contained at least one oxygen atom (excluding CO and CO<sub>2</sub>). All values are reported in C%.

| Compound                                 | Catalyst:Cellulose Mass Ratio |      |      |       |
|------------------------------------------|-------------------------------|------|------|-------|
|                                          | 2:1                           | 10:1 | 20:1 | 200:1 |
| Oxygenates                               | 48.4                          | 8.7  | 0.0  | 0.0   |
| Formaldehyde                             | 1.1                           | 0.0  | 0.0  | 0.0   |
| Acetaldehyde                             | 4.3                           | 0.3  | 0.0  | 0.0   |
| Furan                                    | 0.5                           | 0.5  | 0.0  | 0.0   |
| Acetone                                  | 3.0                           | 0.5  | 0.0  | 0.0   |
| Methyl furan                             | 2.9                           | 2.0  | 0.0  | 0.0   |
| 2-Butanone                               | 1.2                           | 0.3  | 0.0  | 0.0   |
| Glycolaldehyde                           | 0.1                           | 0.0  | 0.0  | 0.0   |
| 2,5-dimethylfuran                        | 4.4                           | 4.5  | 0.0  | 0.0   |
| 1-methyl-2-Cyclohexen-1-ol               | 0.5                           | 0.0  | 0.0  | 0.0   |
| 2-Pentanone                              | 0.9                           | 0.2  | 0.0  | 0.0   |
| Acetic acid                              | 2.4                           | 0.0  | 0.0  | 0.0   |
| Hydroxyacetone                           | 0.4                           | 0.0  | 0.0  | 0.0   |
| 3-Penten-2-one                           | 1.0                           | 0.0  | 0.0  | 0.0   |
| 3-Hexanone                               | 1.0                           | 0.2  | 0.0  | 0.0   |
| 5-Hexen-2-one                            | 0.8                           | 0.0  | 0.0  | 0.0   |
| Cyclopentanone                           | 2.2                           | 0.0  | 0.0  | 0.0   |
| 2(5H)-Furanone                           | 1.0                           | 0.0  | 0.0  | 0.0   |
| 2-methylcyclopentanone                   | 1.3                           | 0.0  | 0.0  | 0.0   |
| 3-Hexen-2-one                            | 1.0                           | 0.0  | 0.0  | 0.0   |
| 3-Methylcyclopentanone                   | 0.6                           | 0.0  | 0.0  | 0.0   |
| 2-Cyclopenten-1-one                      | 5.3                           | 0.0  | 0.0  | 0.0   |
| Furfural                                 | 0.5                           | 0.0  | 0.0  | 0.0   |
| 2-Propylfuran                            | 0.9                           | 0.0  | 0.0  | 0.0   |
| 2-methyl-2-Cyclopenten-1-one             | 4.5                           | 0.0  | 0.0  | 0.0   |
| 2-Acetylfuran                            | 2.1                           | 0.0  | 0.0  | 0.0   |
| 5-methylfurfural                         | 0.9                           | 0.0  | 0.0  | 0.0   |
| 3-methyl-2-Cyclopenten-1-one             | 3.2                           | 0.0  | 0.0  | 0.0   |
| 2-Cyclopenten-1-one, 2-hydroxy-3-methyl- | 0.5                           | 0.1  | 0.0  | 0.0   |

Table S3: Oxygenate product distribution from the hydrodeoxygenation of cellulose pyrolysis model compounds over MoO<sub>3</sub>. Reaction conditions: 120 mL/min H<sub>2</sub>, 0.2  $\mu$ L or 150-200  $\mu$ g feed injection, 0.8 mg MoO<sub>3</sub>, 400 °C catalyst bed, catalyst pre-reduced 1 hr.

| Furfural                     |            | HMF               |            |
|------------------------------|------------|-------------------|------------|
| Product                      | Yield (C%) | Product           | Yield (C%) |
| Furan                        | 3.4        | 2-Methylfuran     | 5.0        |
| 2-Methylfuran                | 45.9       | 2,5-Dimethylfuran | 33.9       |
| C <sub>10</sub> Condensation | 0.4        | 5-Methylfurfural  | 1.4        |
| Oxygenates                   | 49.7       | Oxygenates        | 40.3       |

  

| MG           |            | GA           |            |
|--------------|------------|--------------|------------|
| Product      | Yield (C%) | Product      | Yield (C%) |
| Acetaldehyde | 5.2        | Acetaldehyde | 22.9       |
| Propanal     | 9.4        | Furan        | 3.4        |
| Acetone      | 58.7       | Acetone      | 3.4        |
| Oxygenates   | 73.3       | Oxygenates   | 29.7       |

### S3 X-Ray Diffraction (XRD)

XRD experiments were performed using a Siemens D500 X-Ray diffractometer operated from 10-90  $2\theta$  (Figure S1). It can be seen that after one cellulose pulse, the bulk catalyst is predominately  $\text{MoO}_3$ . However, after the fourth cellulose injection, the bulk catalyst is reduced to  $\text{MoO}_2$ . Similar results have been reported in the literature by Prasomsri *et al.*, whereby  $\text{MoO}_3$  is reduced to  $\text{MoO}_2$  at longer time on stream (*Energy & Environmental Science*, 2014, **7**, 2660–2669).

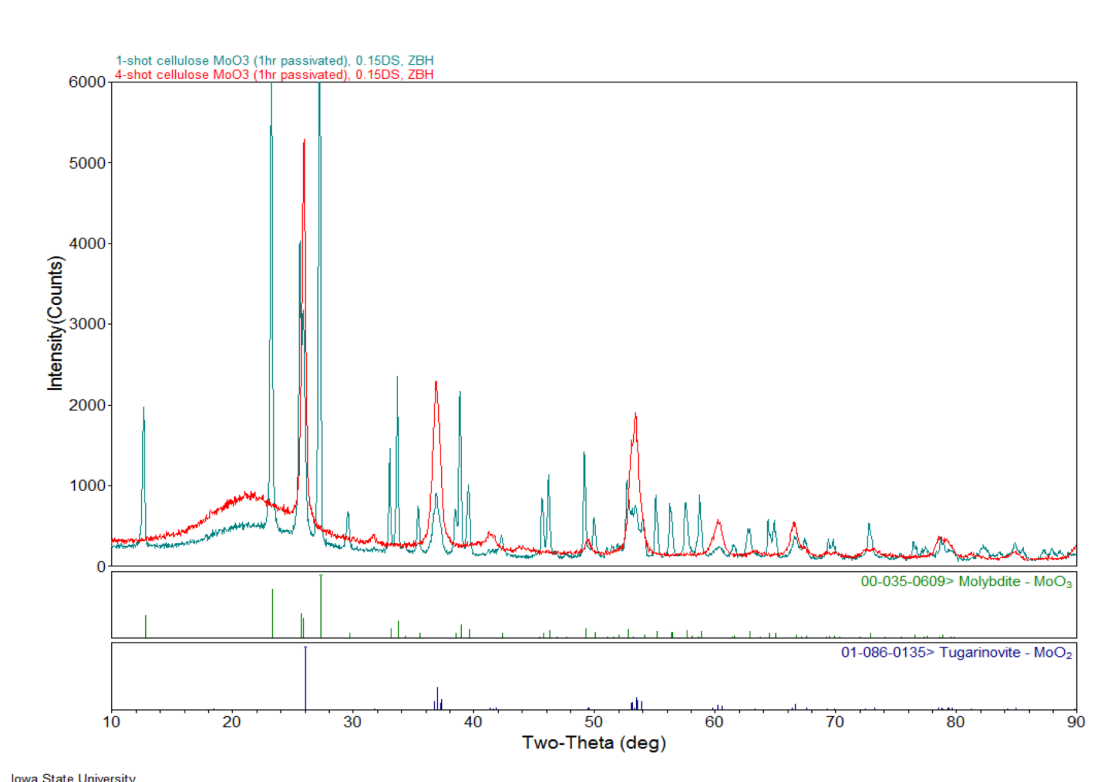

Figure S1: X-Ray diffractograms of used  $\text{MoO}_3$  catalyst after 1 and 4 cellulose injections. Reaction conditions: 120 mL/min  $\text{H}_2$ , 300  $\mu\text{g}$  cellulose injection, 60 mg  $\text{MoO}_3$ , 400  $^\circ\text{C}$  catalyst bed, catalyst pre-reduced 1 hr.
